# Supplementary material for: Aloe djiboutiensis: Antioxidant Activity, Molecular Networking-Based Approach and In Vivo Toxicity of This Endemic Species in Djibouti
Source: MDPI journal article supplement (doi:10.3390/molecules26103046), 2021-05-20

## Supplementary materials

### ***Aloe djiboutiensis*: antioxidant activity, molecular networking-based dereplication and *in vivo* toxicity of this endemic species in Djibouti**

Abdirahman Elmi<sup>1,2</sup>, Fatouma M. Abdoul-Latif<sup>2</sup>, Rosella Spina<sup>1</sup>, Francois Dupire<sup>1</sup>, Stephanie Philippot<sup>1</sup>, Marie-France Champy<sup>3</sup>, Hugues Jacobs<sup>3</sup>, Dominique Laurain-Mattar<sup>1\*</sup>

1 Université de Lorraine, CNRS, L2CM, F-54000 Nancy, France; abelfourreh@hotmail.com (A.E.); rosella.spina@univ-lorraine.fr (R.S.); francois.dupire@univ-lorraine.fr (F.D.); stephanie.philippot@univ-lorraine.fr (S.P.);

2 Medicinal Research Institute, Centre d'Etudes et de Recherche de Djibouti, IRM-CERD, Route de l'Aéroport, Haramous B.P. 486, Djibouti; fatouma\_abdoulatif@yahoo.fr (F.M.A.-I.)

3 PHENOMIN-ICS, Institut Clinique de la souris, CNRS, UMR7104, Illkirch, France ; INSERM, U1258, Illkirch, France; Université de Strasbourg, France ; champy@igbmc.fr (M.F.C.) ; hugues@igbmc.fr (H.J.).

\* Correspondence: dominique.mattar@univ-lorraine.fr (D.L.M.); Tel.: +33 3 72 74 56 75

## Contents

**Figure S1:** MS/MS spectrum of compound 1, Aloin A/B.

**Figure S2:**  $^1\text{H}$ -NMR spectrum of the fraction FR-II in MeOD (400 MHz).

**Figure S3:**  $^{13}\text{C}$ -NMR spectrum of the fraction FR-II in MeOD (100 MHz).

**Figure S4:** MS/MS spectrum of compound 8, Isoaloeresin D.

**Figure S5:**  $^1\text{H}$ -NMR spectrum of the fraction FR-I in MeOD (400 MHz).

**Figure S6:**  $^{13}\text{C}$ -NMR spectrum of the fraction FR-I in MeOD (100 MHz).

**Figure S7:** MS/MS spectrum of compounds 9 A/B, Aloesinol\_2''-O-(4-Methoxy-cinnamoyl) derivatives.

**Figure S8:** MS/MS spectrum of compounds 10 A/B, Isoaloeresin D glucosyle derivatives.

**Figure S1:** MS/MS spectrum of compound 1, Aloin A/B.

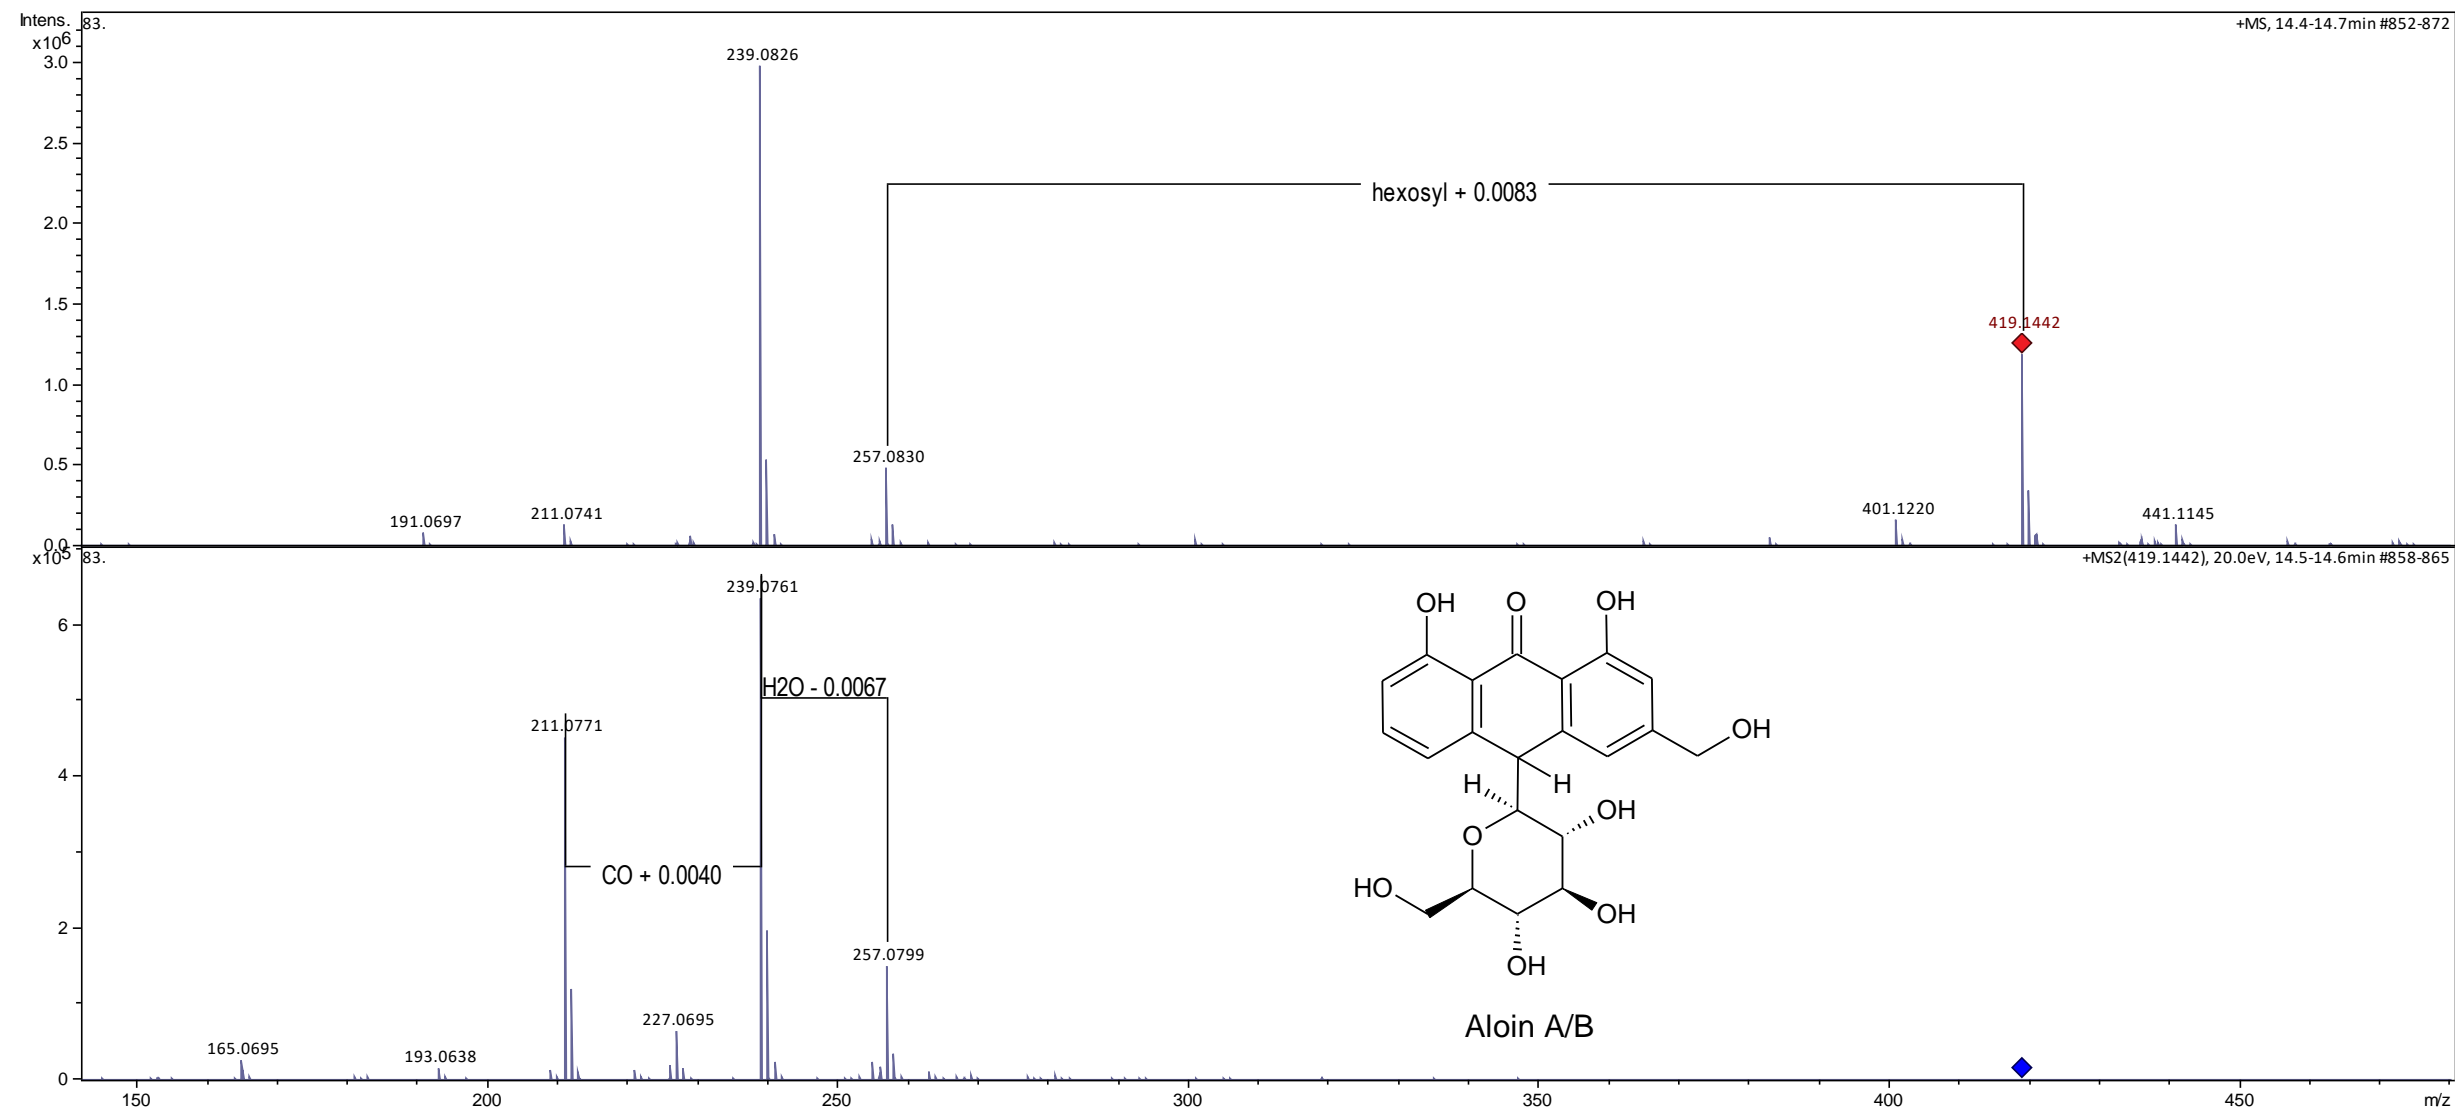

**Figure S2:**  $^1\text{H}$ -NMR spectrum of the fraction FR-II in MeOD (400 MHz).  
The characteristic signals of compound 1, Aloin A/B, are visible.

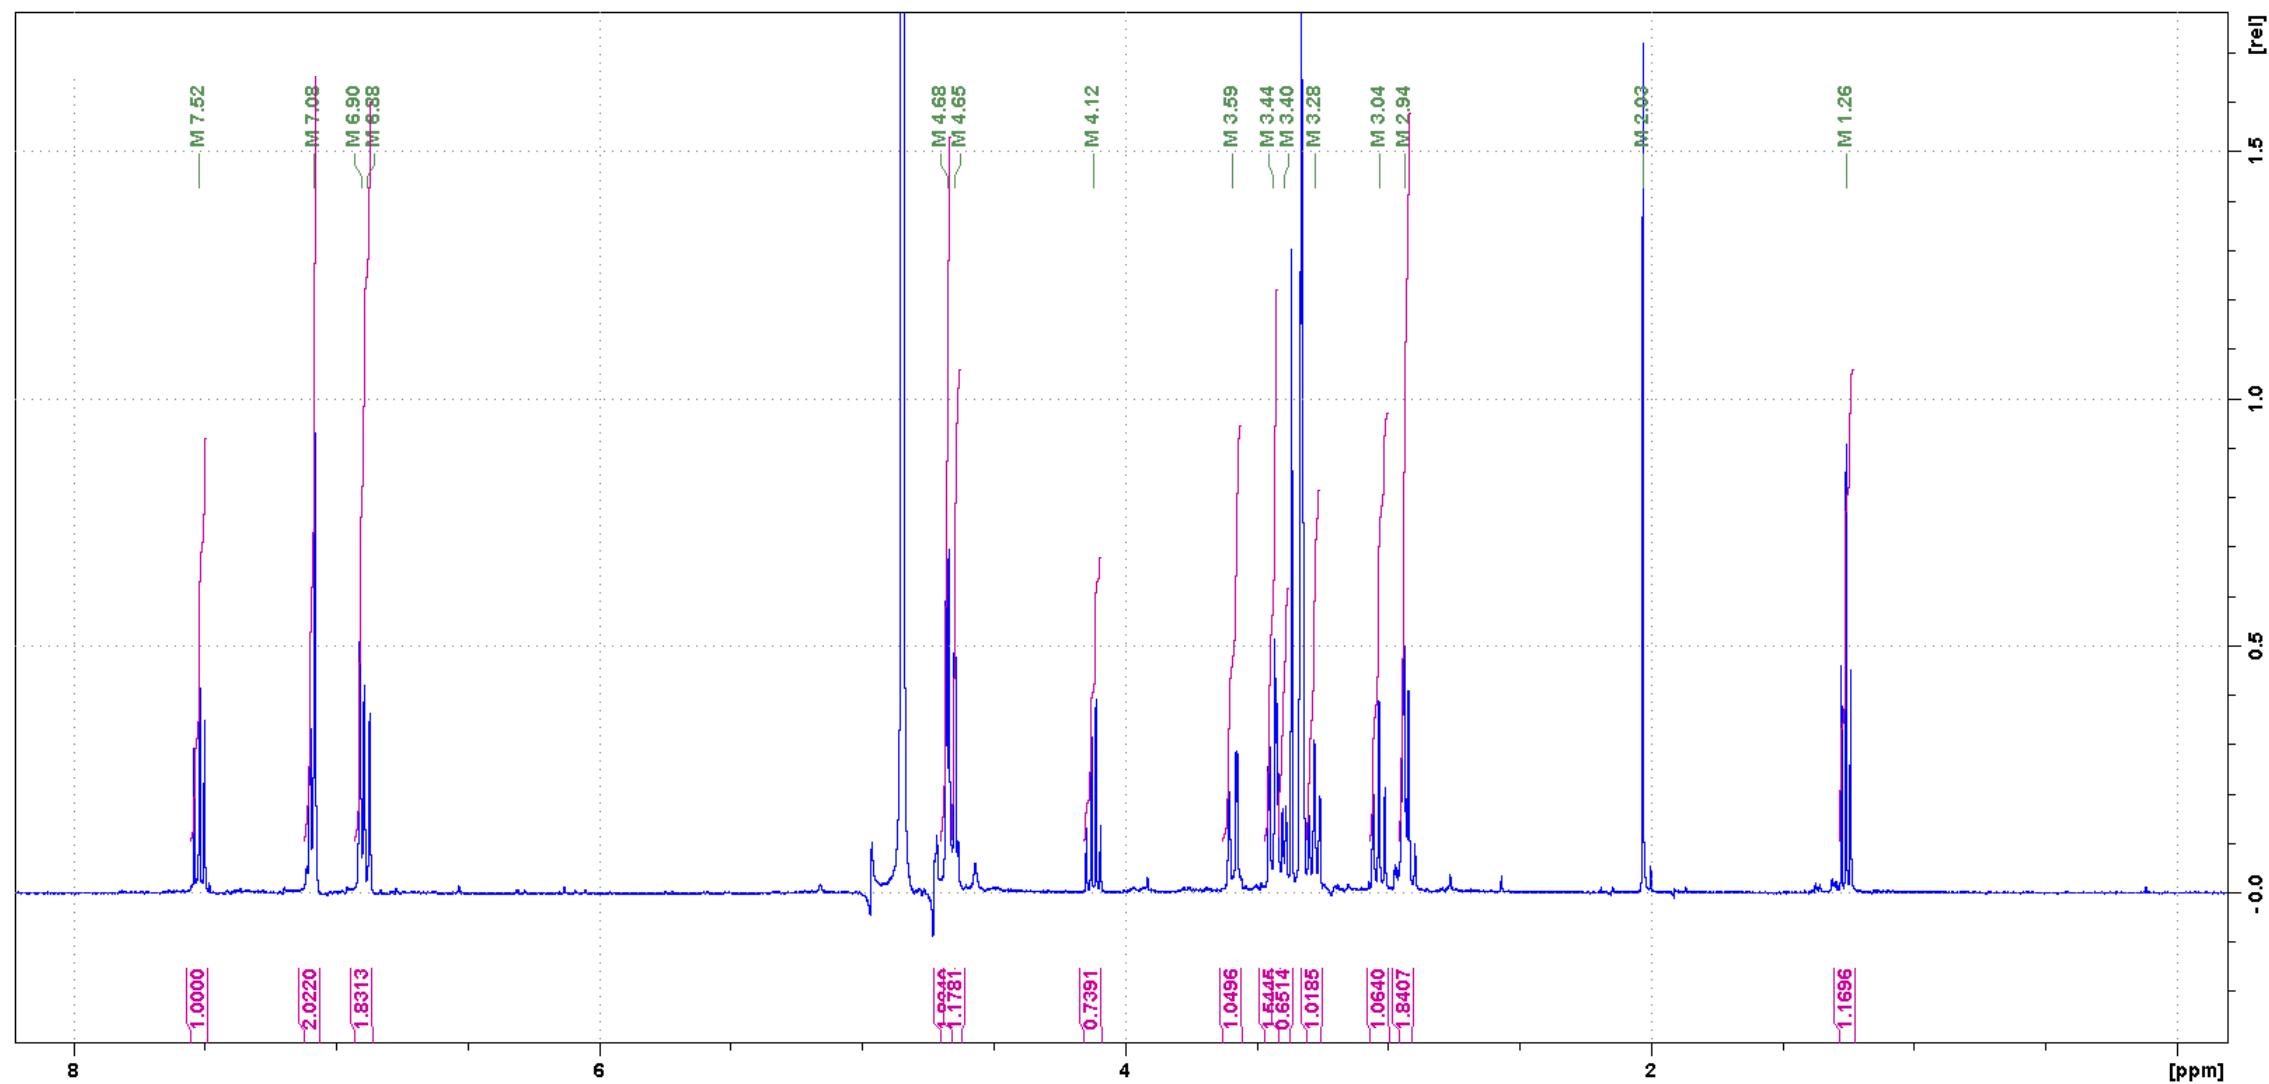

**Figure S3:**  $^{13}\text{C}$ -NMR spectrum of the fraction FR-II in MeOD (100 MHz).  
The characteristic signals of compound 1, Aloin A/B, are visible.

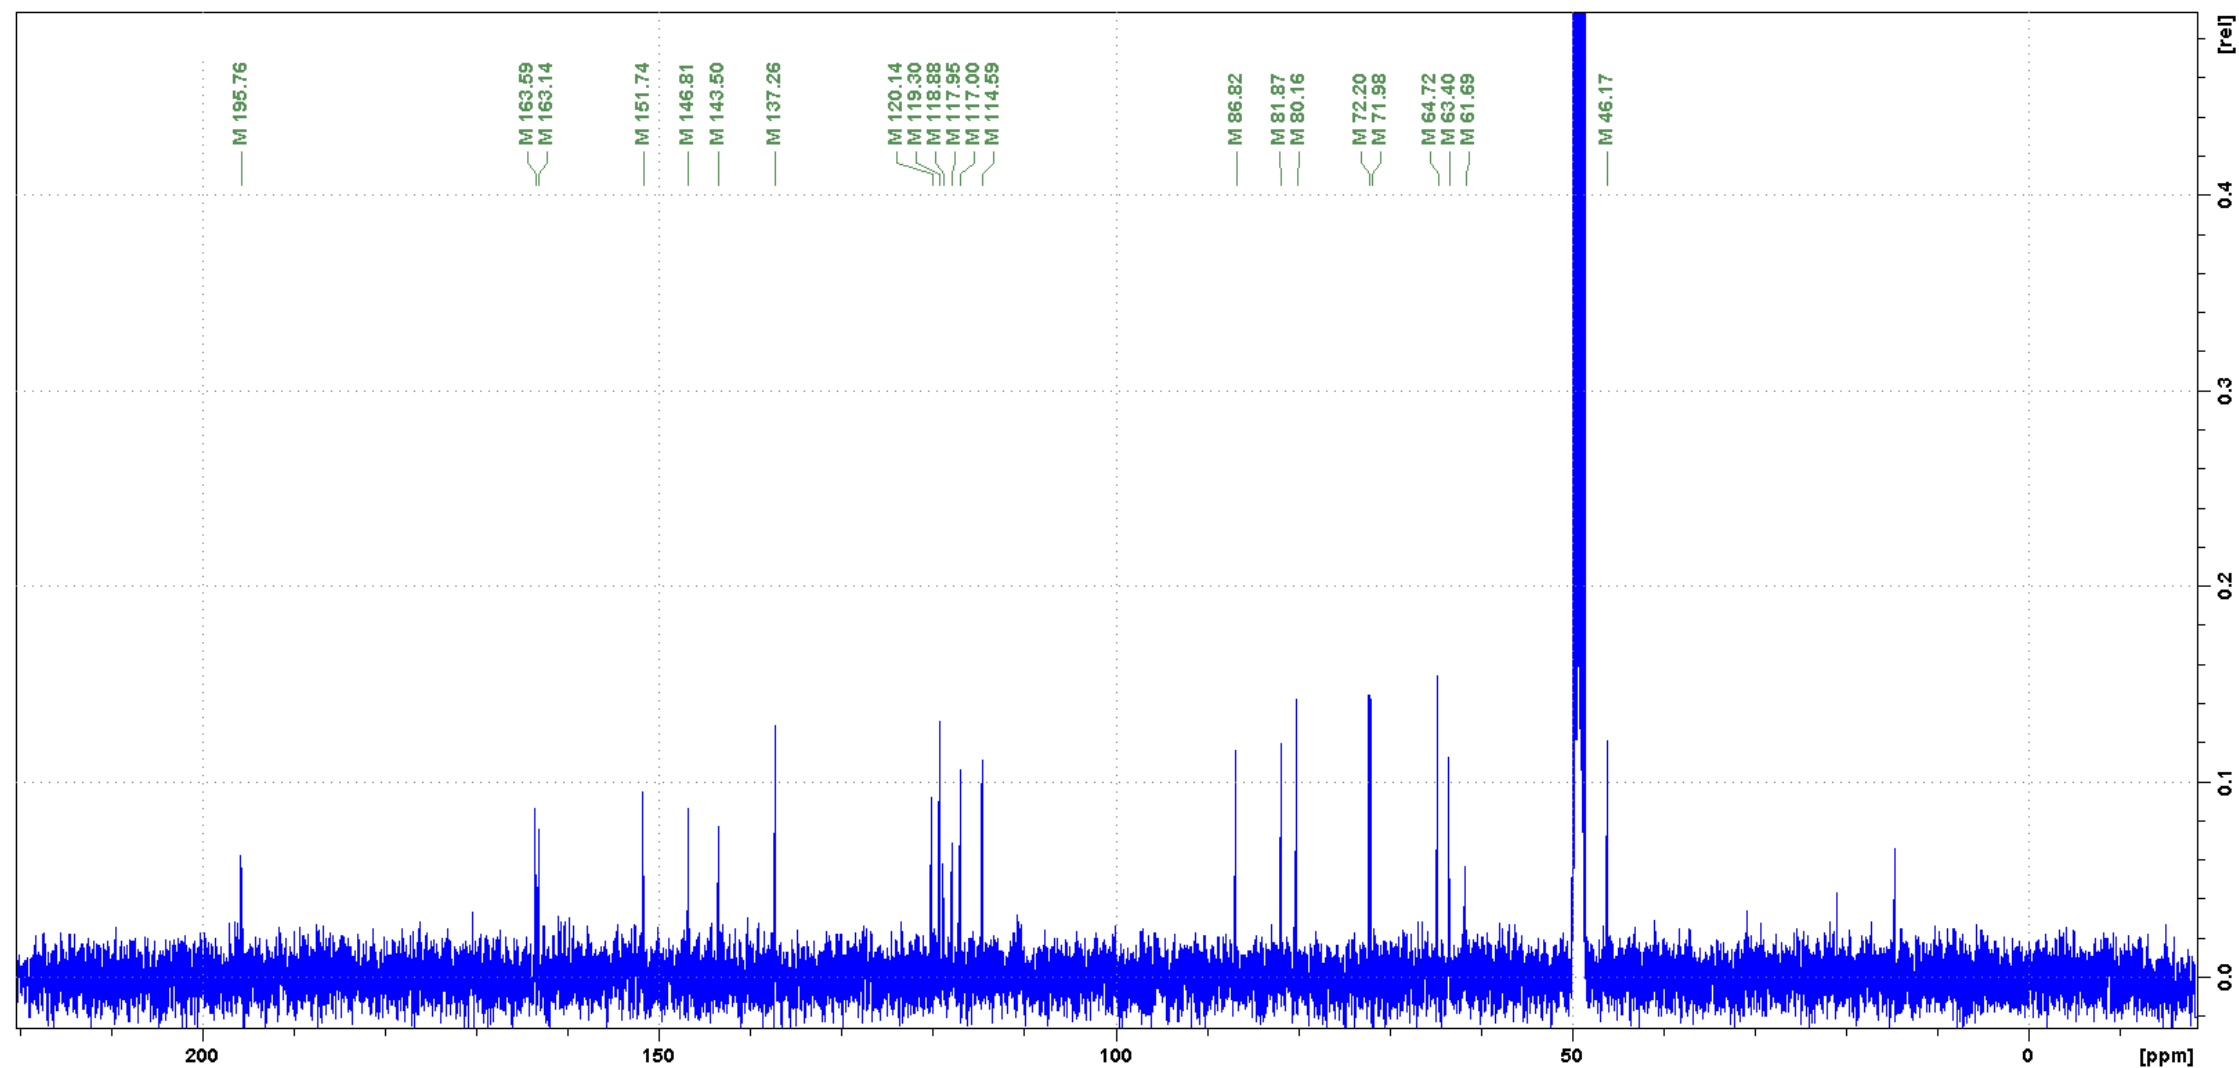

$^{13}\text{C}$  NMR (100 MHz,  $\text{CD}_3\text{OD}$ ):  $\delta$  (ppm) 195.7, 163.6, 163.1, 151.7, 151.7, 146.8, 143.5, 137.3, 120.1, 119.3, 118.9, 117.9, 117.0, 114.6, 86.8, 81.9, 80.2, 72.2, 72.0, 64.7, 63.4.

**Figure S4:** MS/MS spectrum of compound 8, Isoaloeresin D.

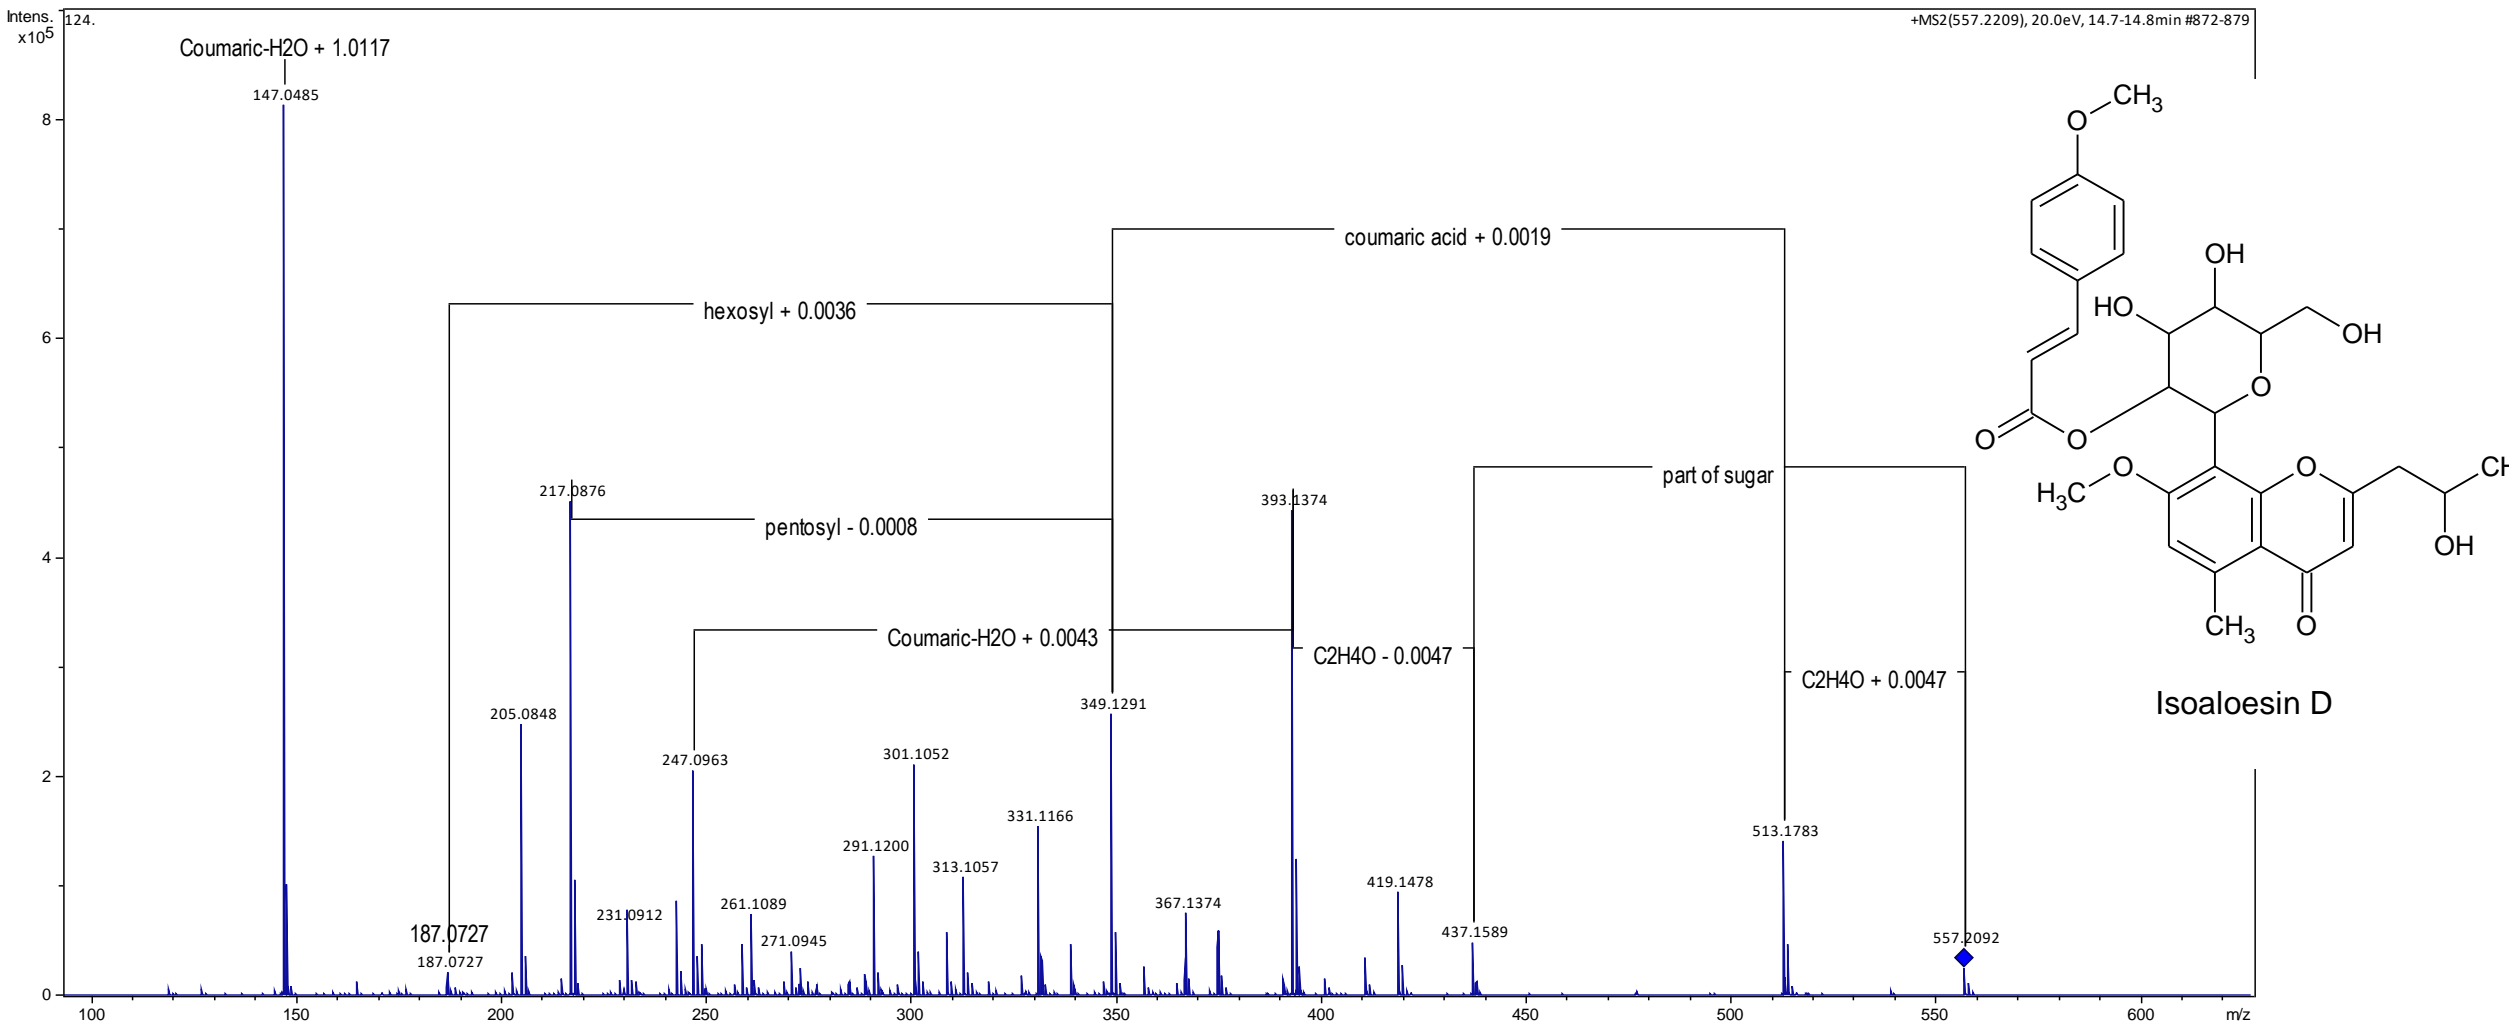

**Figure S5:**  $^1\text{H}$ -NMR spectrum of the fraction FR-I in MeOD (400 MHz).  
The characteristic signals of the compound 8, Isoaloeresin D, are visible.

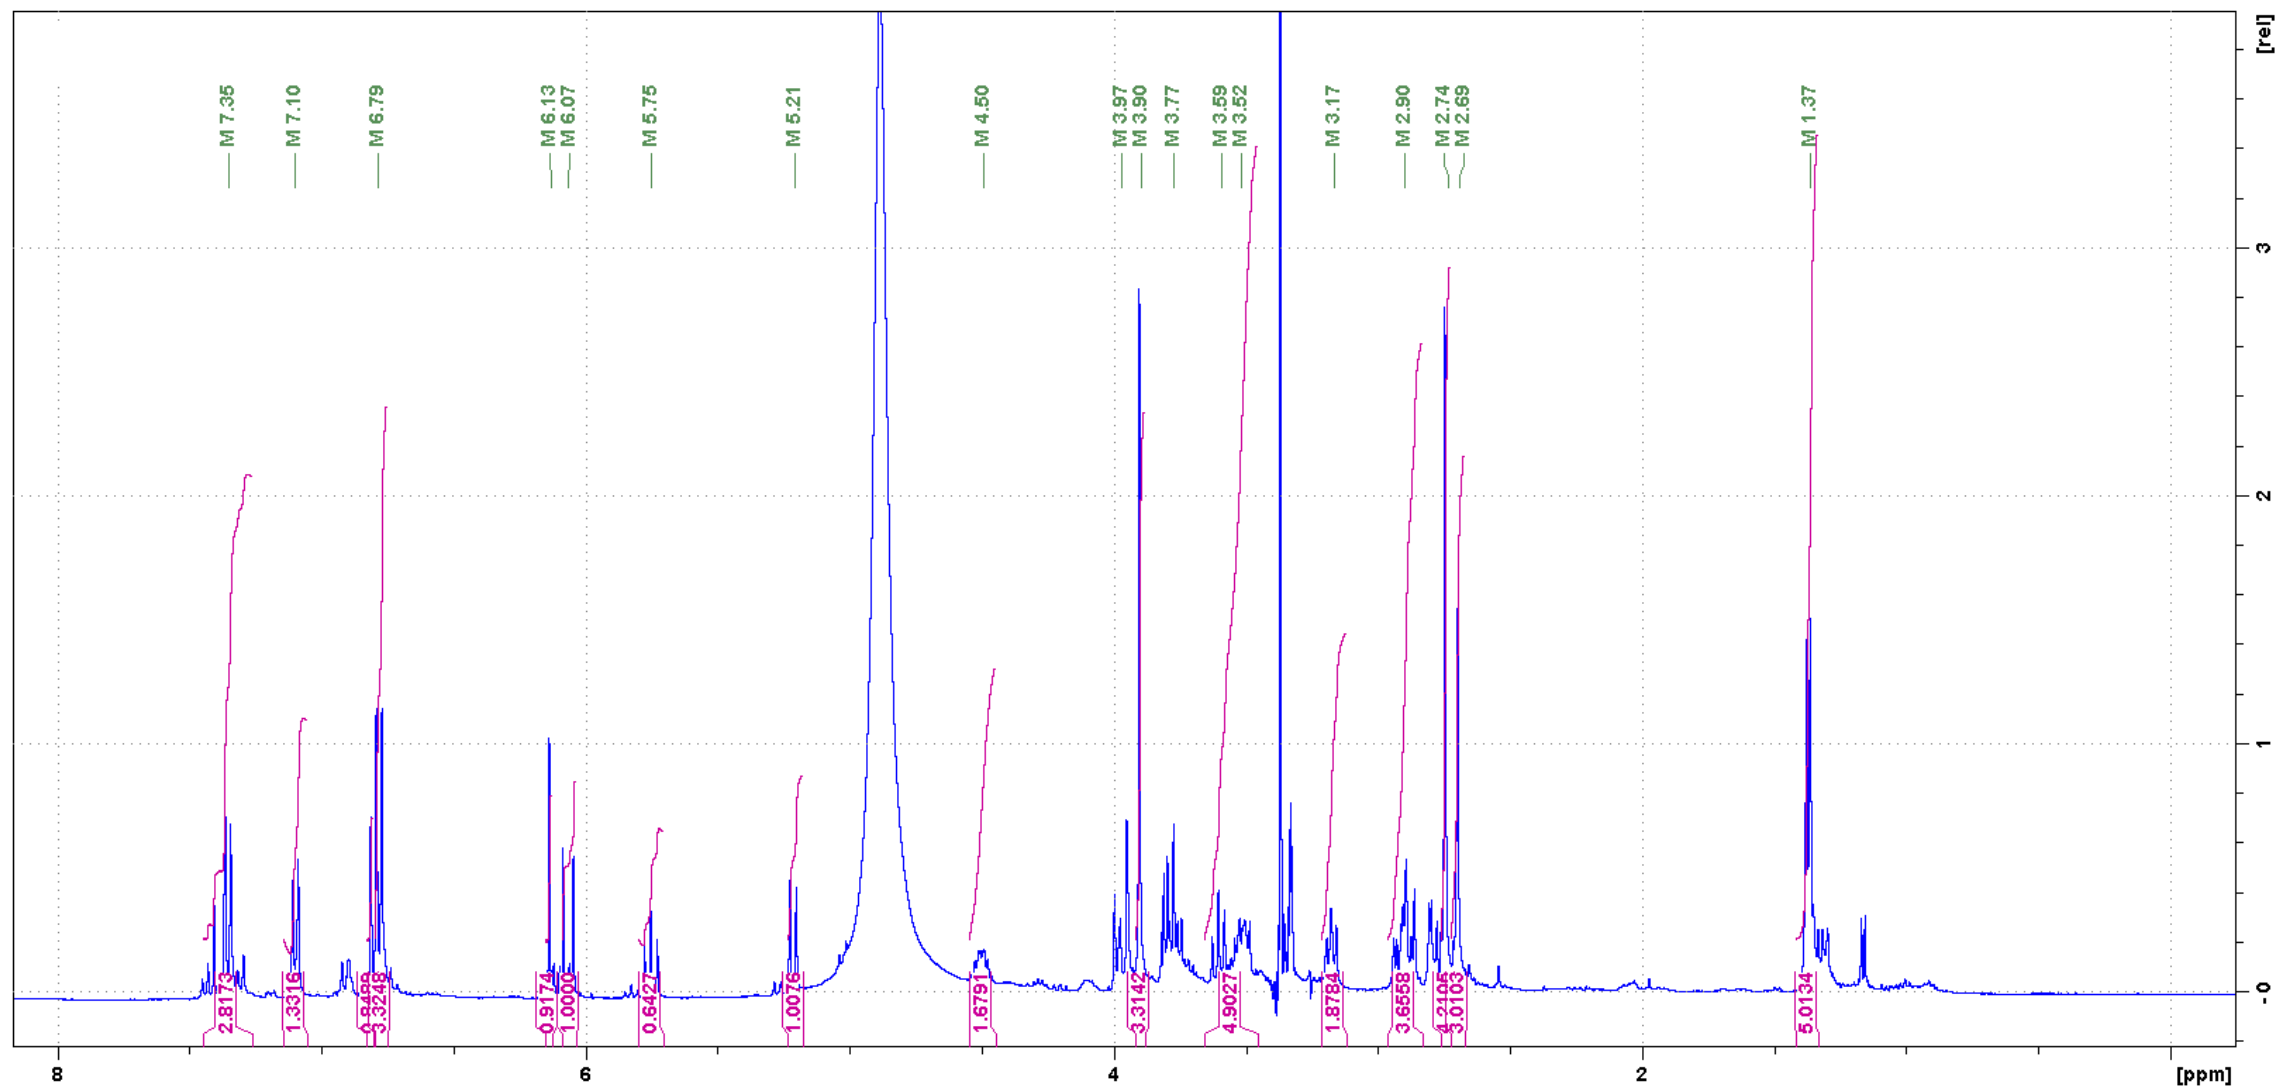

**Figure S6:**  $^{13}\text{C}$ -NMR spectrum of the fraction FR-I in MeOD (100 MHz).  
The characteristic signals of the compound 8, Isoaloeresin D, are visible.

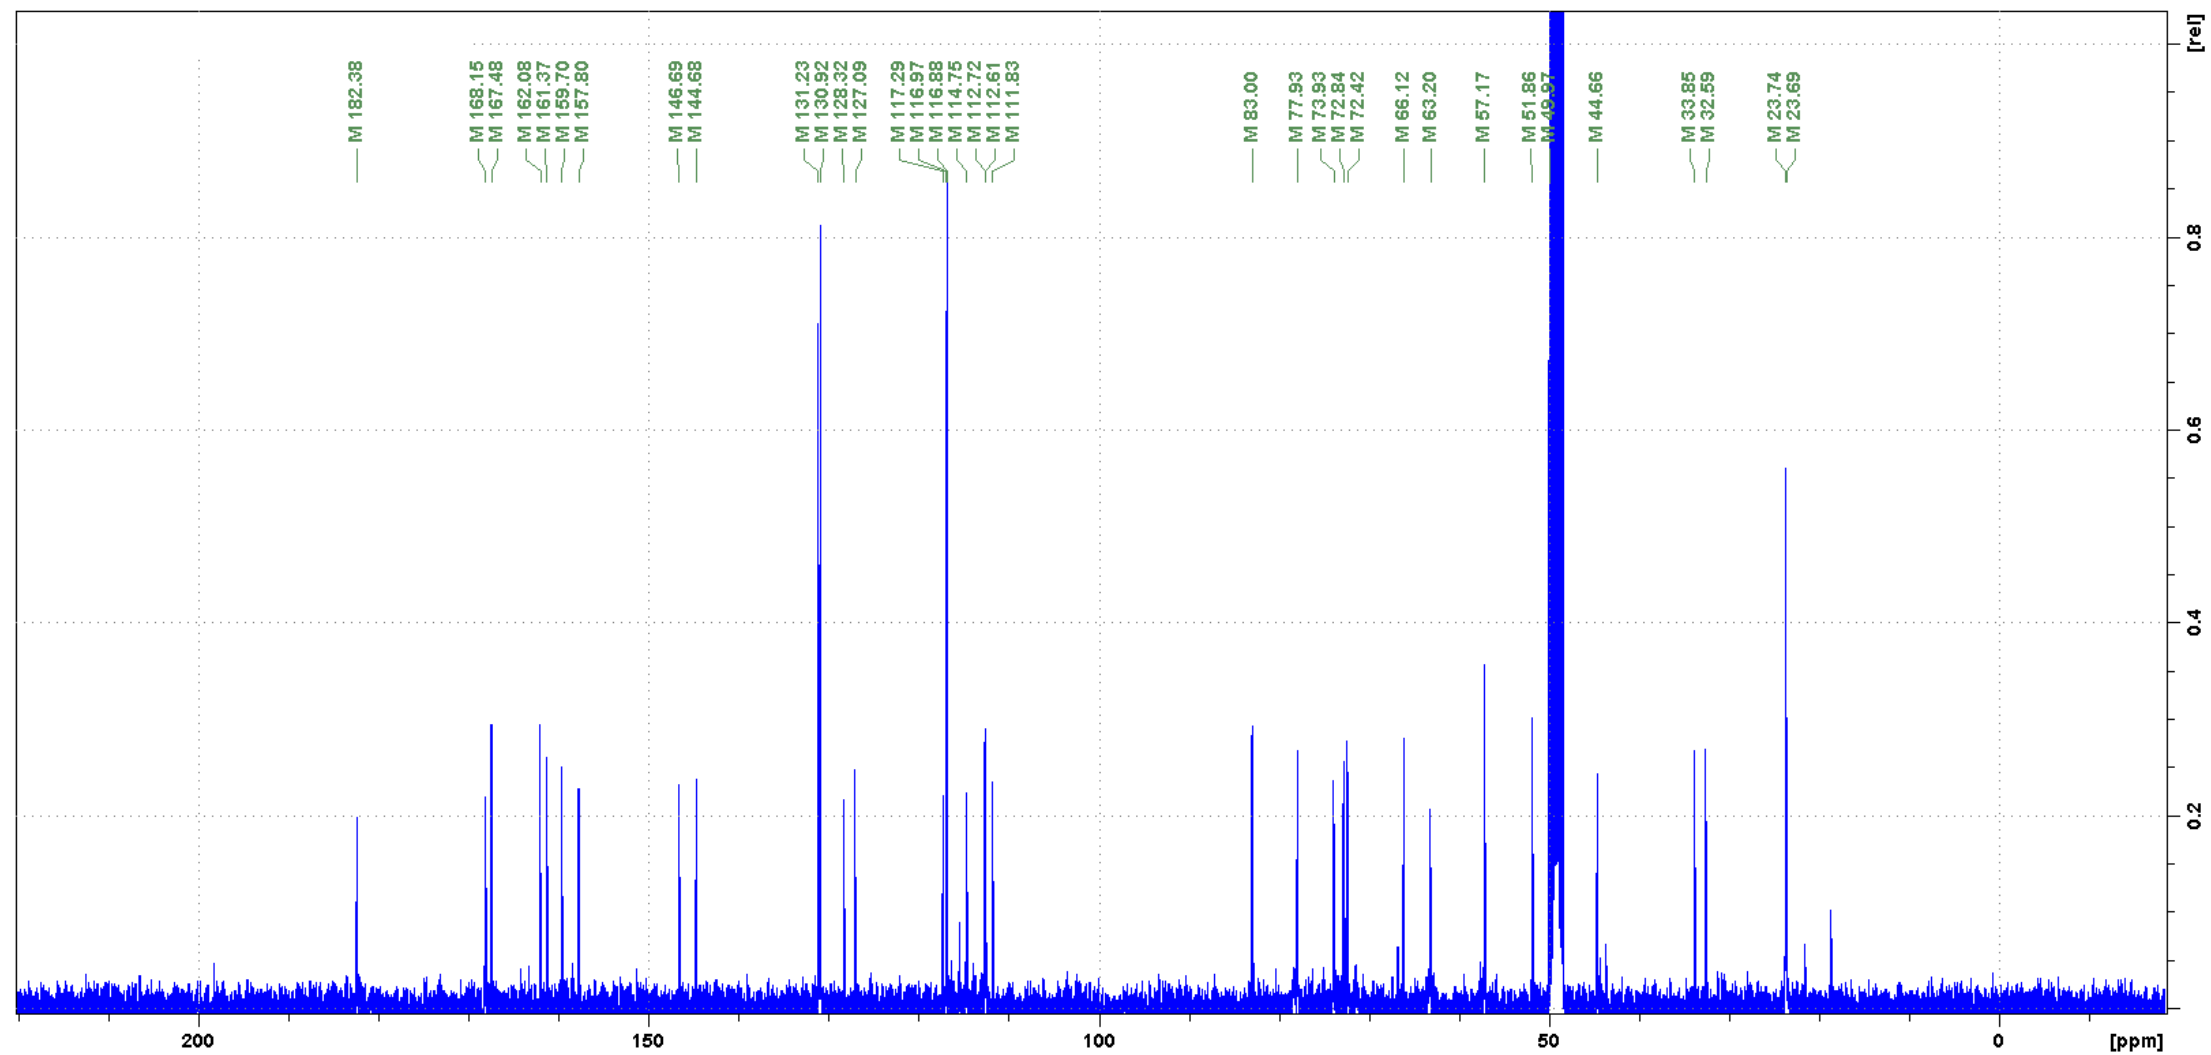

$^{13}\text{C}$  NMR (100 MHz,  $\text{CD}_3\text{OD}$ ):  $\delta$  (ppm) 182.4, 168.1, 167.5, 162.1, 161.4, 159.7, 146.7, 144.7, 131.2, 130.9, 127.1, 117.3, 117.0, 116.9, 114.7, 112.7, 112.6, 111.8, 83.0, 77.9, 73.9, 72.8, 72.4, 66.1, 63.2, 57.2, 44.7, 23.7, 23.6

**Figure S7:** MS/MS spectrum of compounds 9 A/B, Aloesinol\_2''-O-(4-Methoxy-cinnamoyl) derivatives

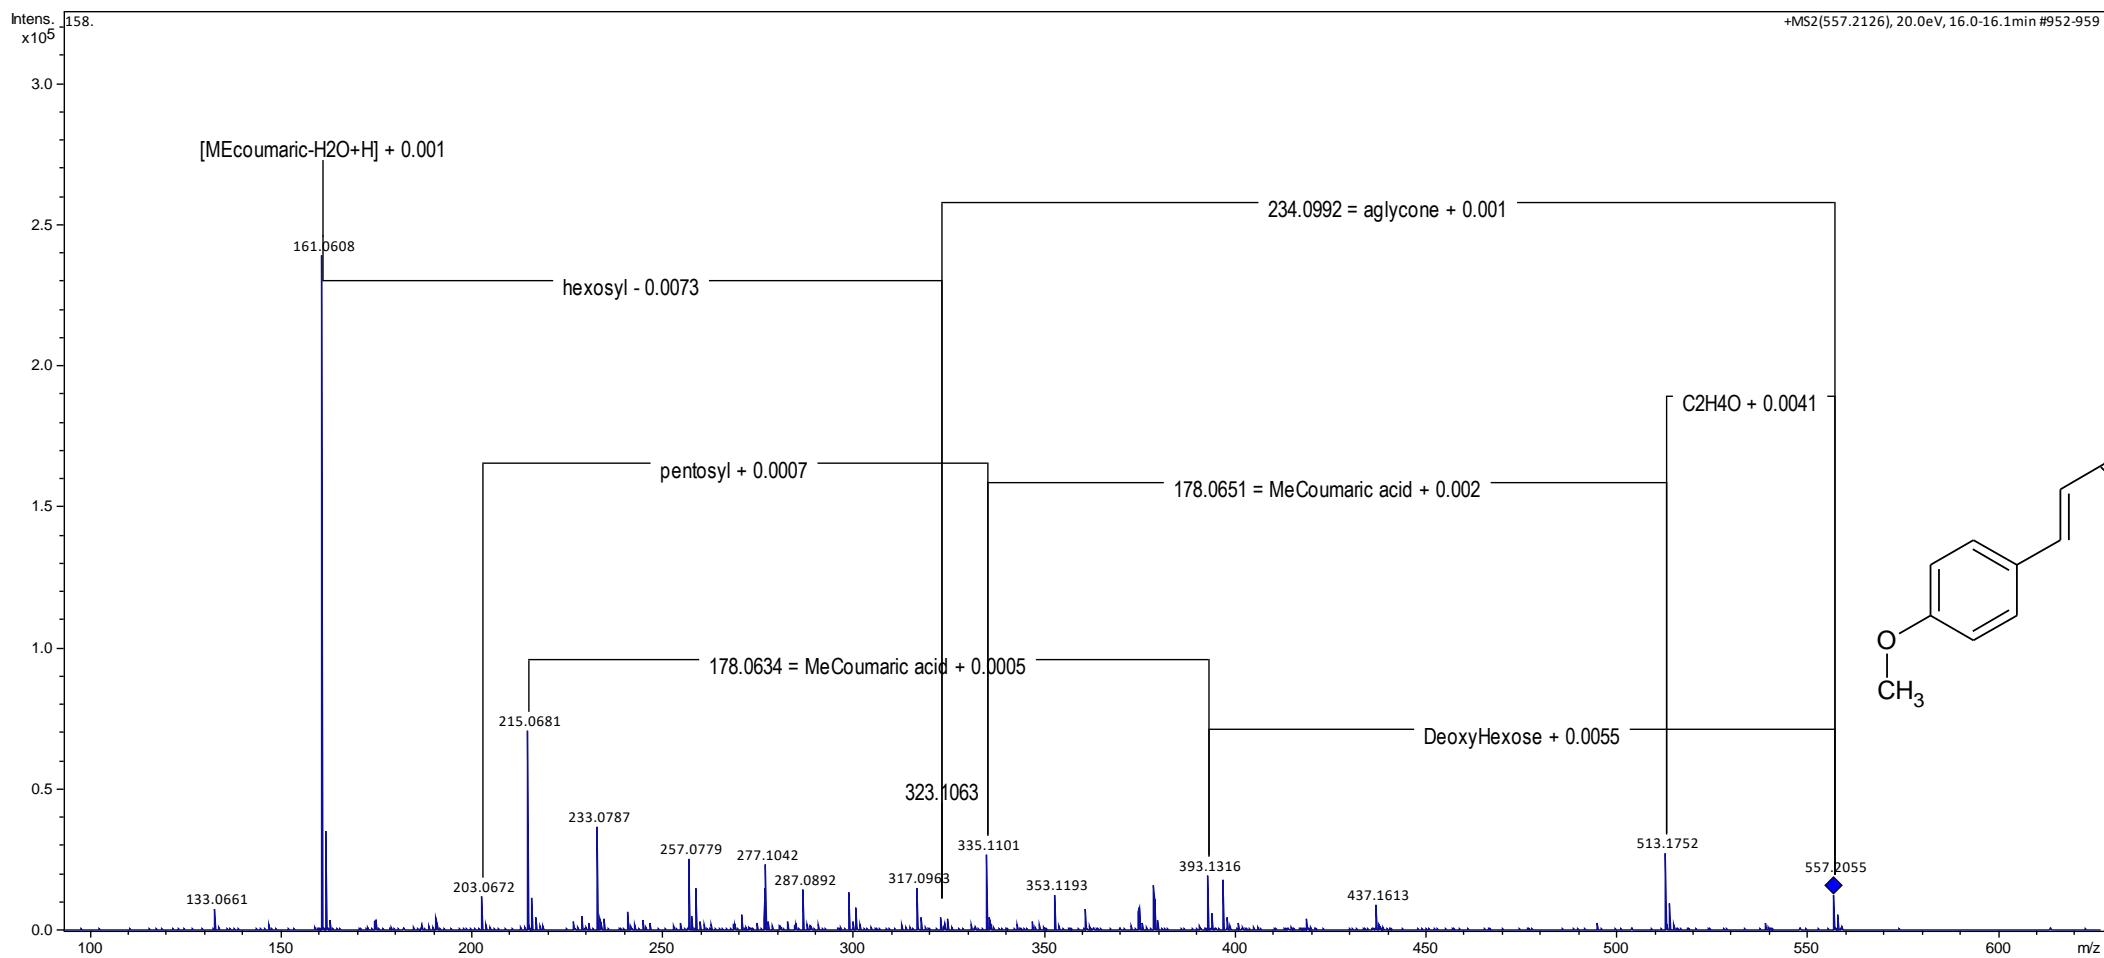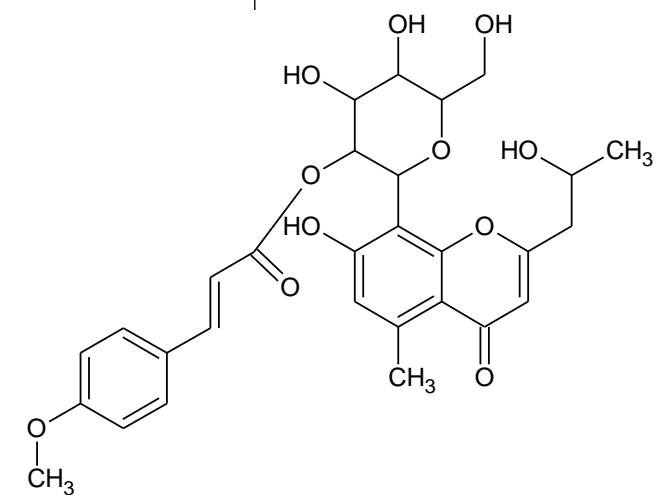

**Figure S8:** MS/MS spectrum of compounds 10 A/B, Isoaloeresin D glycosyle derivatives

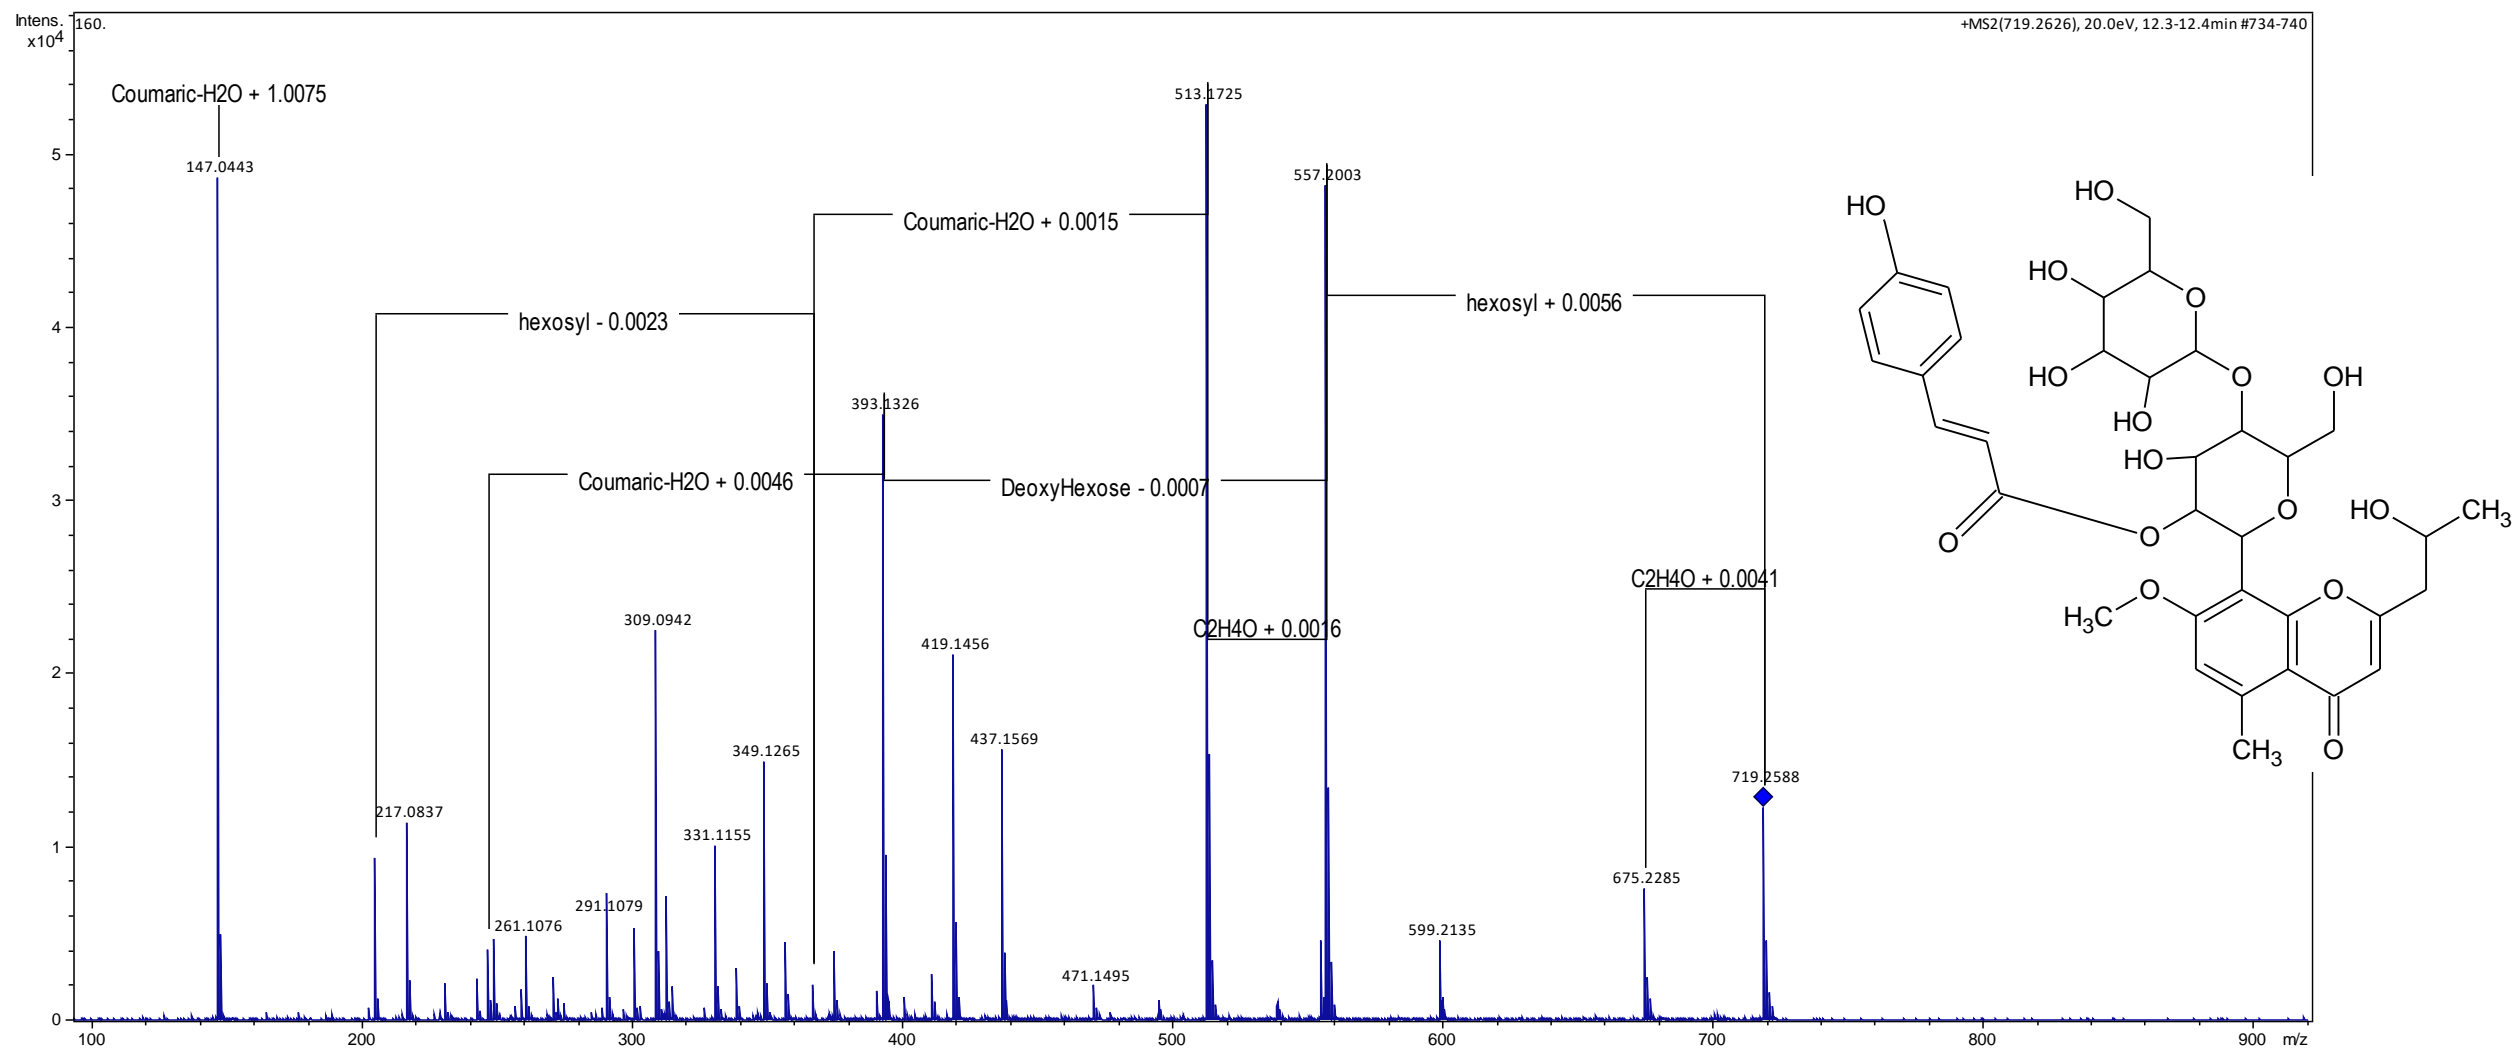

Supplement: s1 [file s1]
